# Supplementary material for: Phage-mimicking antibacterial core–shell nanoparticles
Source: Royal Society of Chemistry journal article supplement (doi:10.1039/c9na00461k), 2019-01-01

## Supplementary Information:

### Phage-Mimicking Antibacterial Core-Shell Nanoparticles

Juliane Hopf,<sup>a</sup> Margo Waters,<sup>b</sup> Veronica Kalwajtys,<sup>c</sup> Katelyn E. Carothers, Ryan K. Roeder<sup>b,d</sup>, Joshua D. Shrout,<sup>a</sup> Shaun W. Lee,<sup>c</sup> and Prakash D. Nallathamby<sup>\*b,d,e</sup>

<sup>a</sup> *Department of Civil and Environmental Engineering and Earth Sciences, University of Notre Dame, Notre Dame, IN, USA*

<sup>b</sup> *Department of Aerospace and Mechanical Engineering, University of Notre Dame, Notre Dame, IN, USA*

<sup>c</sup> *Department of Biological Sciences, University of Notre Dame, Notre Dame, IN, USA*

<sup>d</sup> *Center for Nanoscience and Technology (NDnano), University of Notre Dame, Notre Dame, IN, USA*

<sup>e</sup> *Center for Advanced Diagnostics and Therapeutics (AD&T), University of Notre Dame, Notre Dame, IN, USA*

\*Corresponding author information:

Prakash D. Nallathamby, Ph.D.

E-mail: pnallath@nd.edu

Phone: +1 (574) 631-7868

**Keywords:** antibiotic resistance, ESKAPE pathogens, core-shell, phage-mimicking, antibacterial nanoparticles

**Figure S1:** Darkfield microscopy was used to assess the effect of phage-mimicking ANPs treatment on the morphology of *S. aureus* USA300. Scale bars are 10  $\mu\text{m}$ .

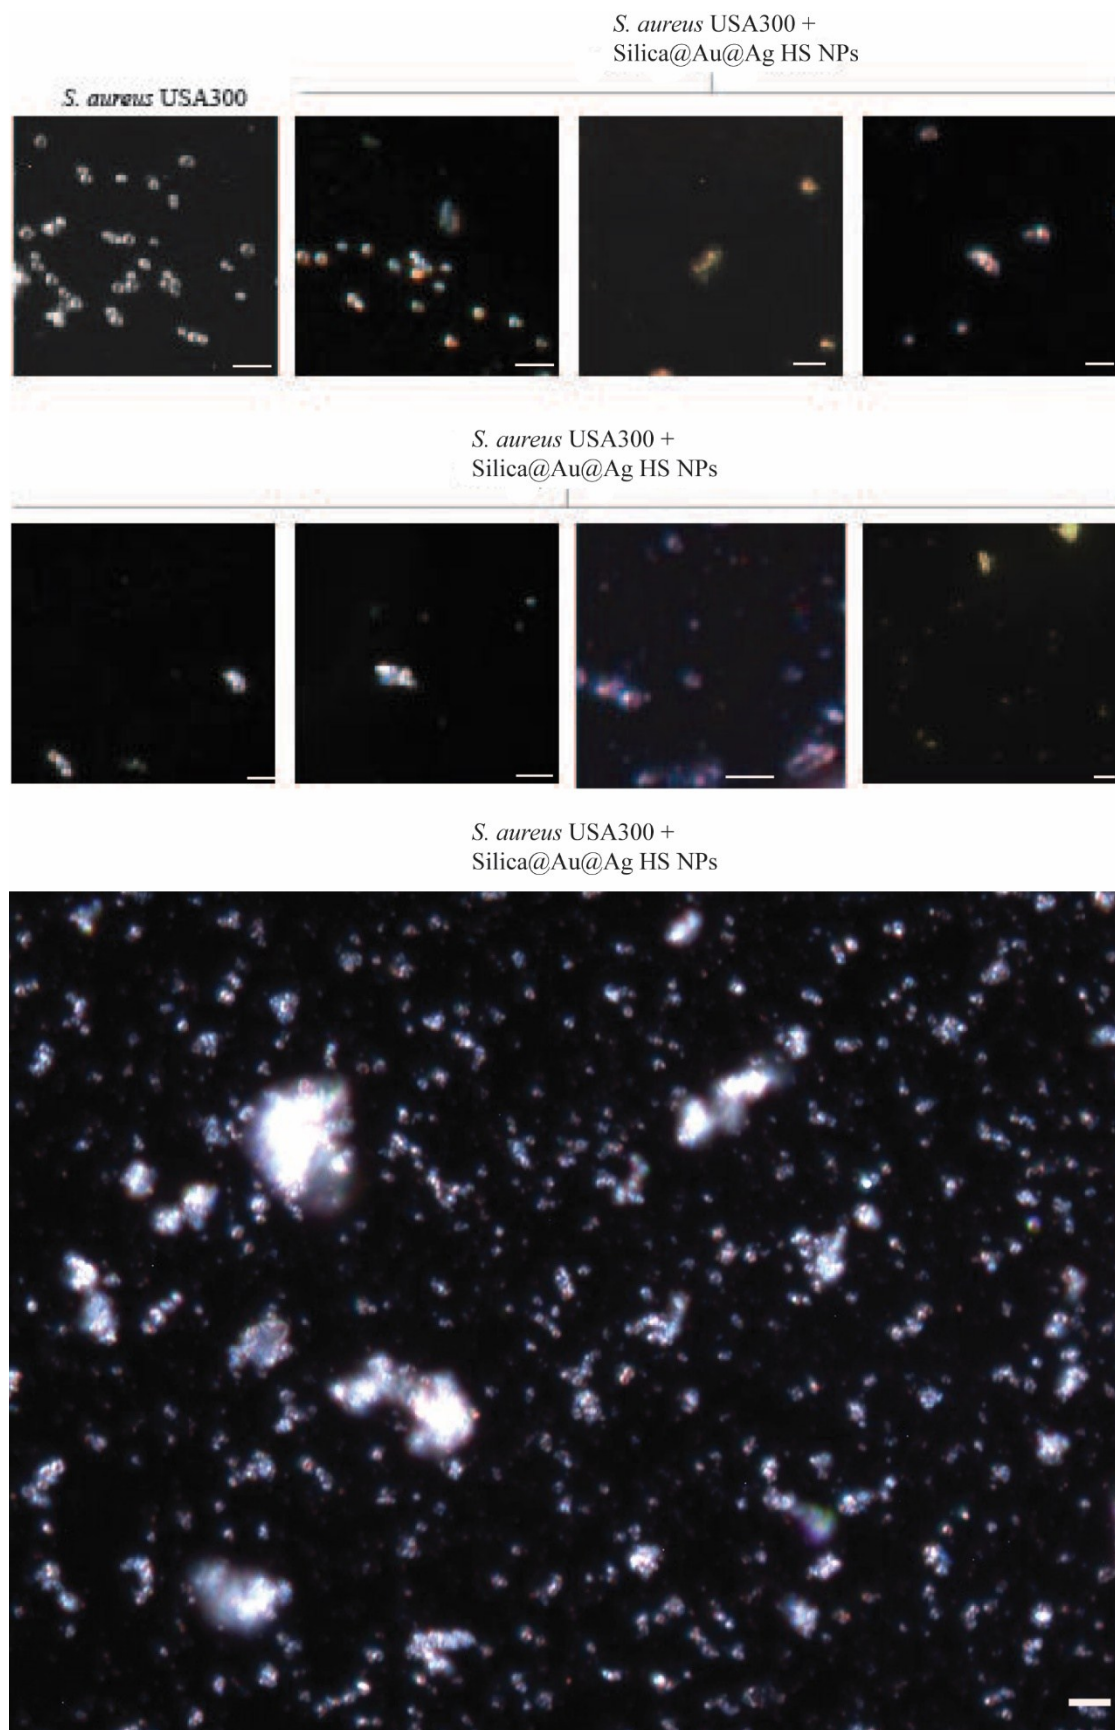

**Figure S2:** Representative linear slopes of the log phase of *S. aureus* USA300 in the presence of 1 ml of phage-mimicking ANPs LS, phage-mimicking ANPs MS, phage-mimicking ANPs HS and 0 ml of phage-mimicking ANPs. The core diameter of the phage-mimicking ANPs was 45 nm. The log phase of the growth curves was fitted linearly, and the linear slope of each curve was determined to compare the silver coverage-dependent antimicrobial effect of phage-mimicking ANPs on *S. aureus* USA300. A similar analysis was used to determine the antimicrobial effect of phage-mimicking ANPs on *P. aeruginosa* FRD1, *C. striatum* and *E. faecalis*.

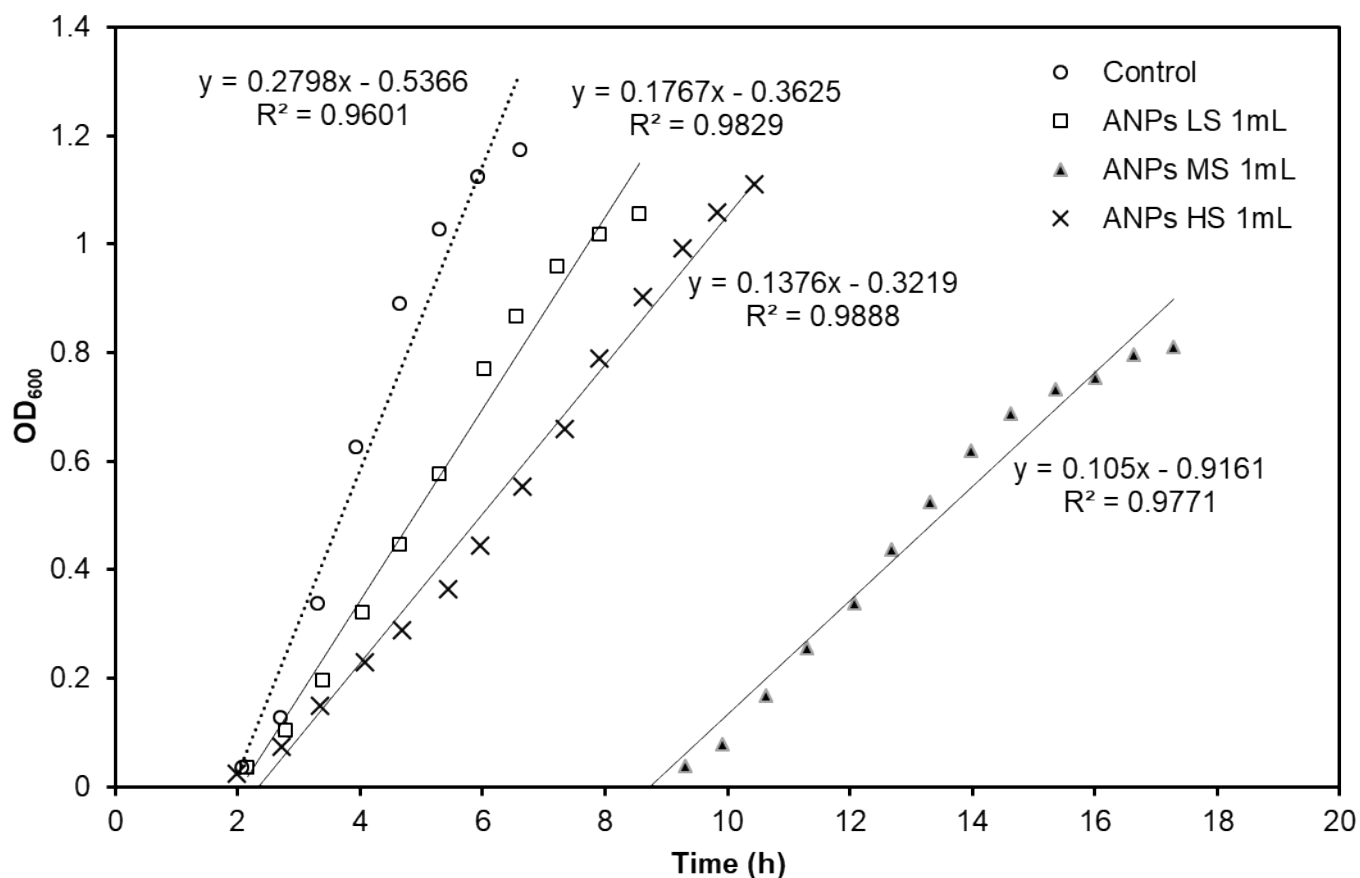

**Figure S3:** Representative linear slopes of the log phase of *P. aeruginosa* FRD1 in the presence of either 0 ml or 0.1 ml or 0.5 ml or 1 ml of phage-mimicking ANPs MS. The phage-mimicking ANPs MS had core diameters of either 45 nm or 130 nm.

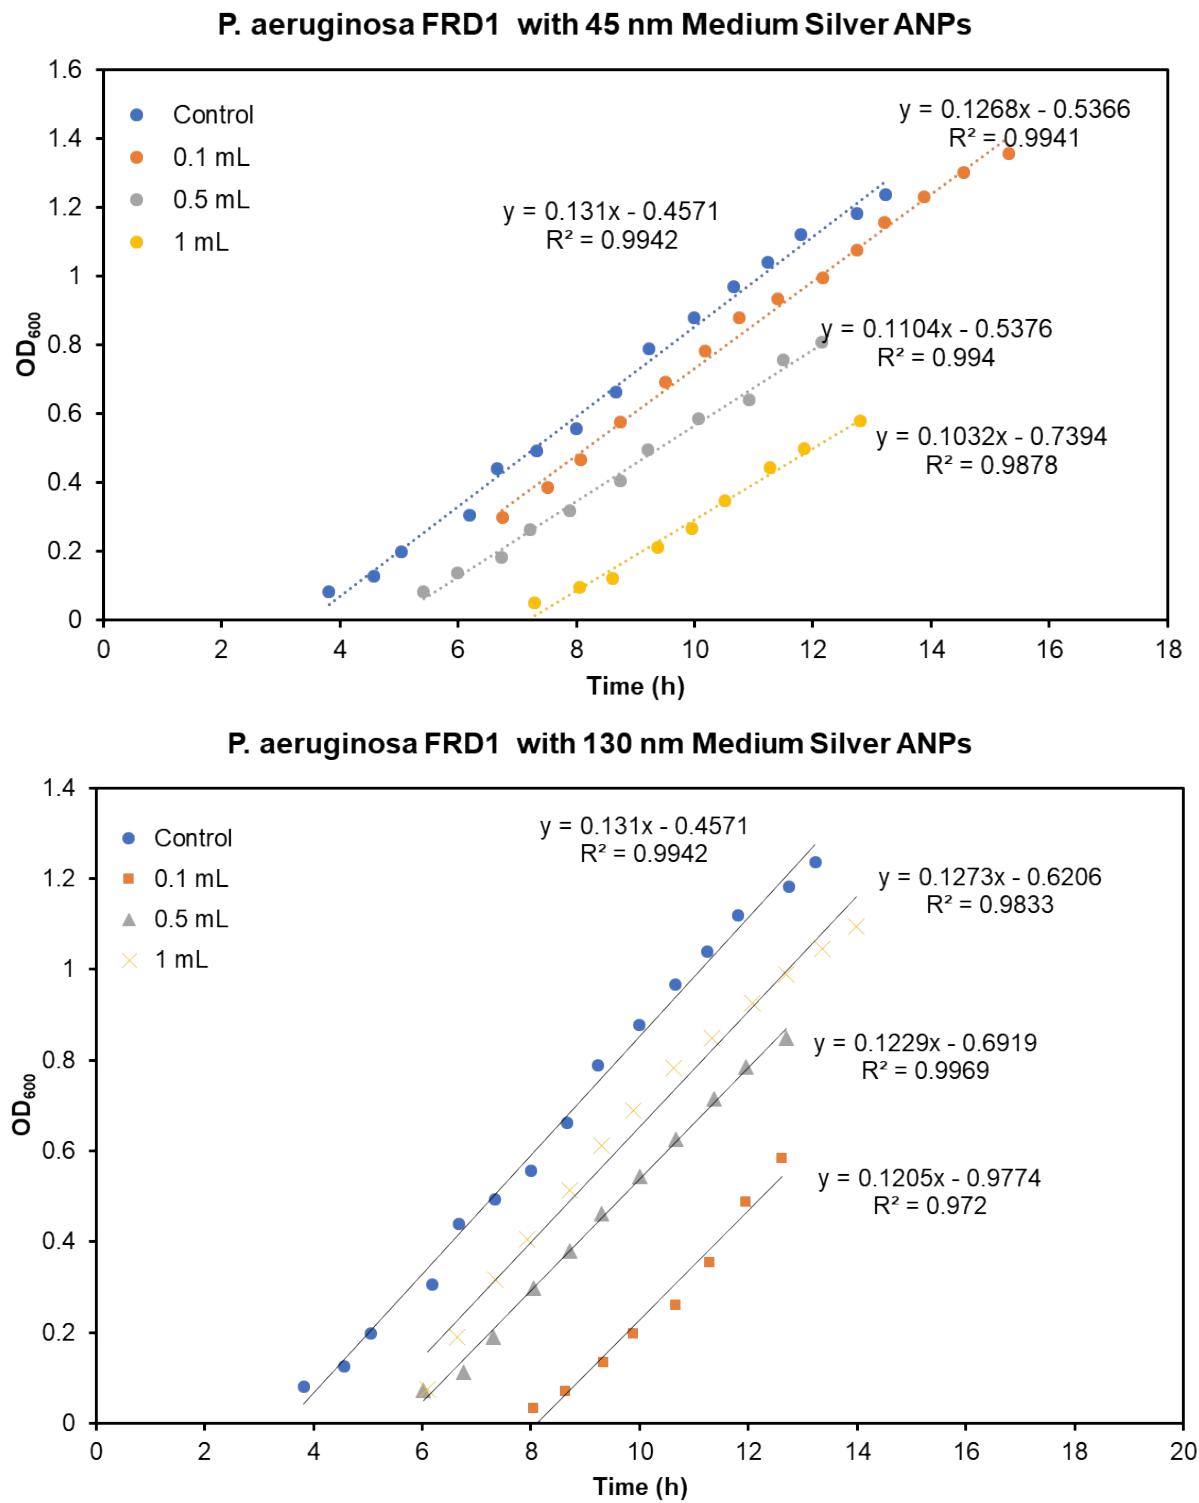

**Figure S4:** Representative linear slopes of the log phase of *E. faecalis* in the presence of either 0 ml, or 0.1 ml or 0.5 ml or 1 ml of phage-mimicking ANPs MS. The phage-mimicking ANPs MS had core diameters of either 45 nm or 130 nm.

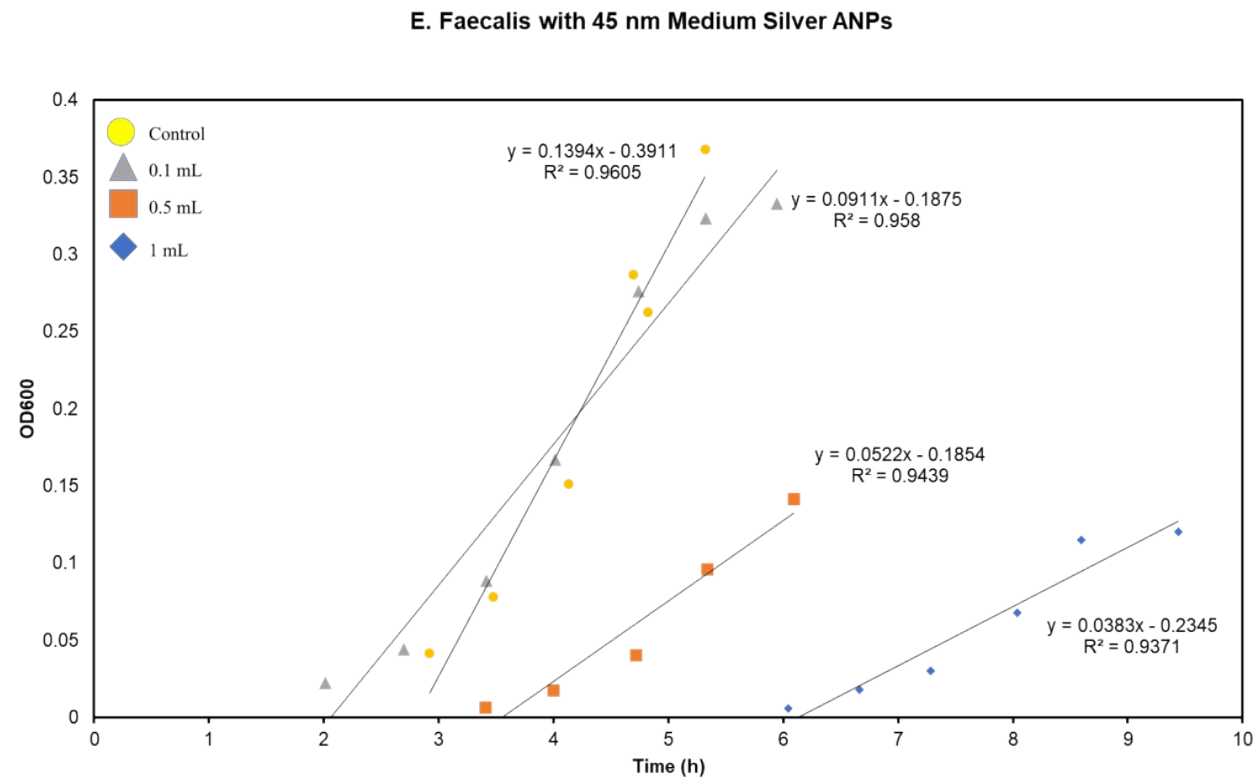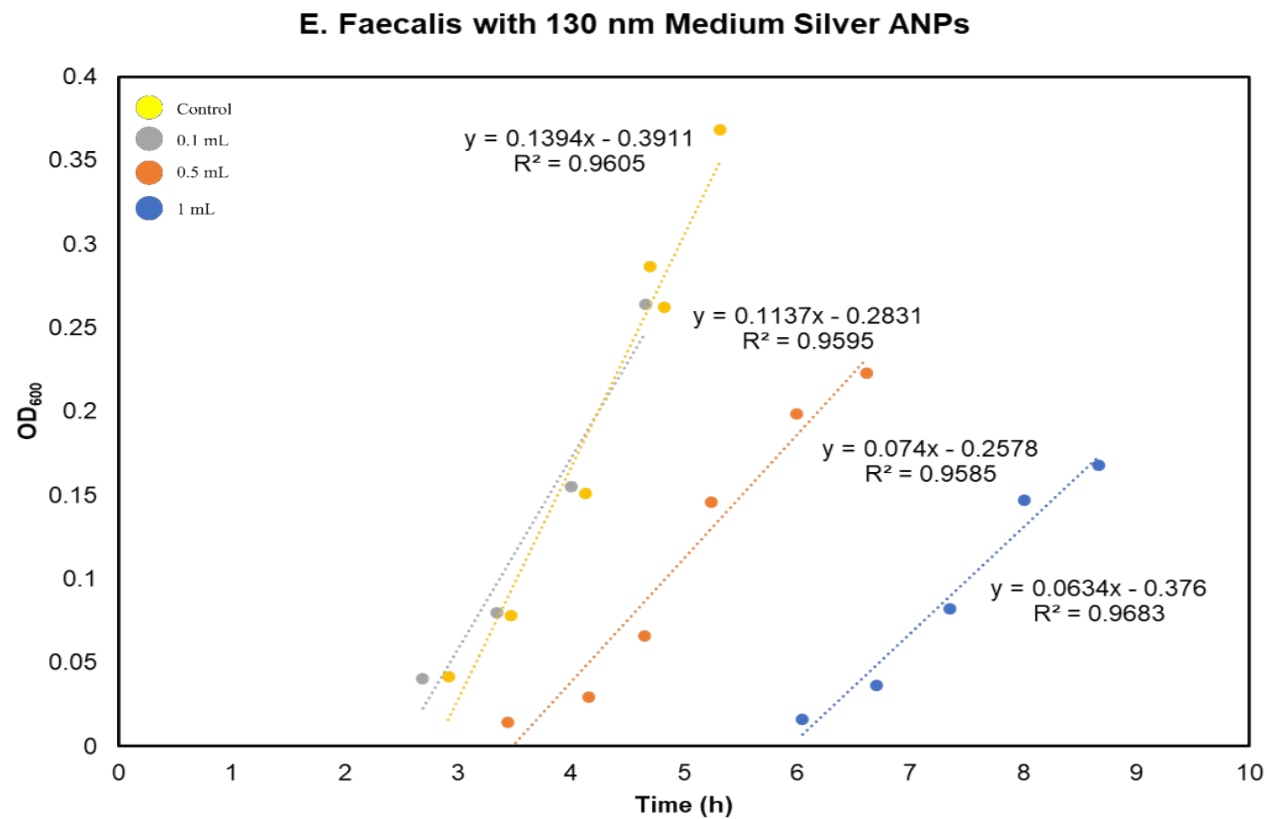

**Figure S5:** Representative linear slopes of the log phase of *C. Striatum* in the absence of phage-mimicking ANPs and in the presence of 1 ml of either LS, or MS, or HS phage-mimicking ANPs. The phage-mimicking ANPs had core diameters of either 45 nm or 130 nm.

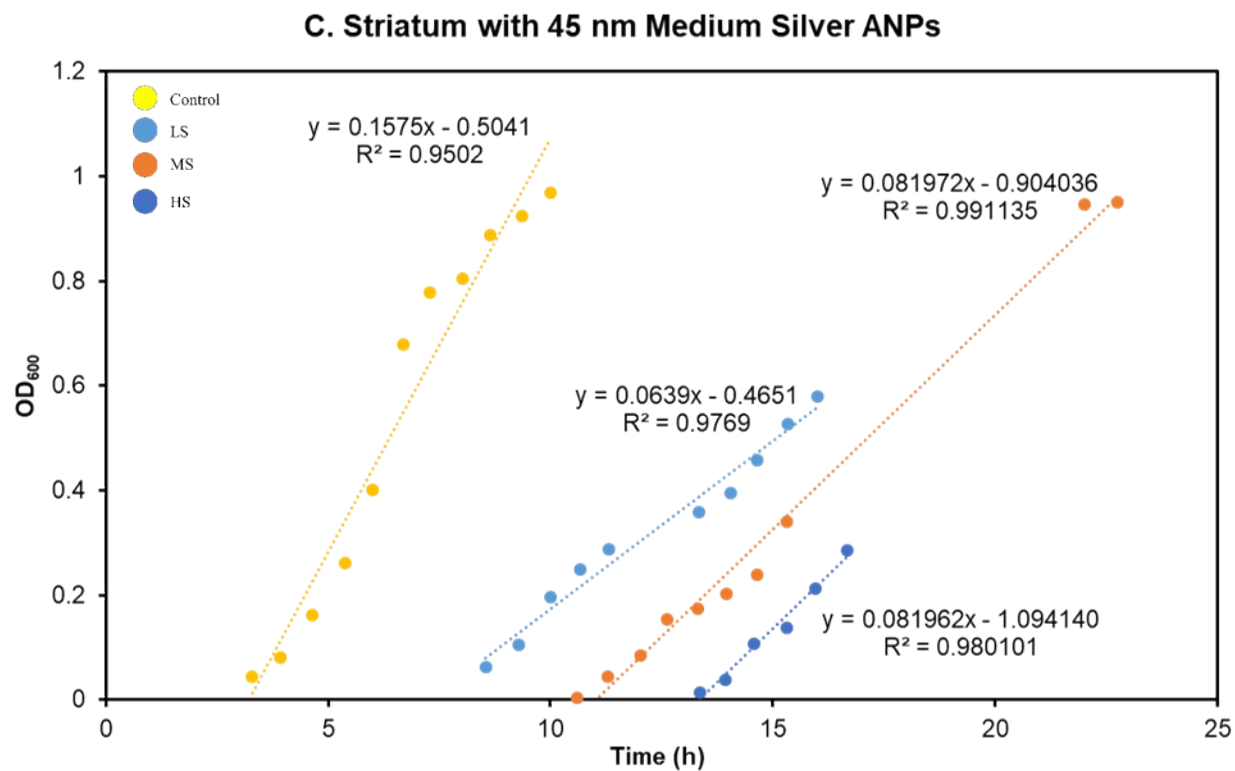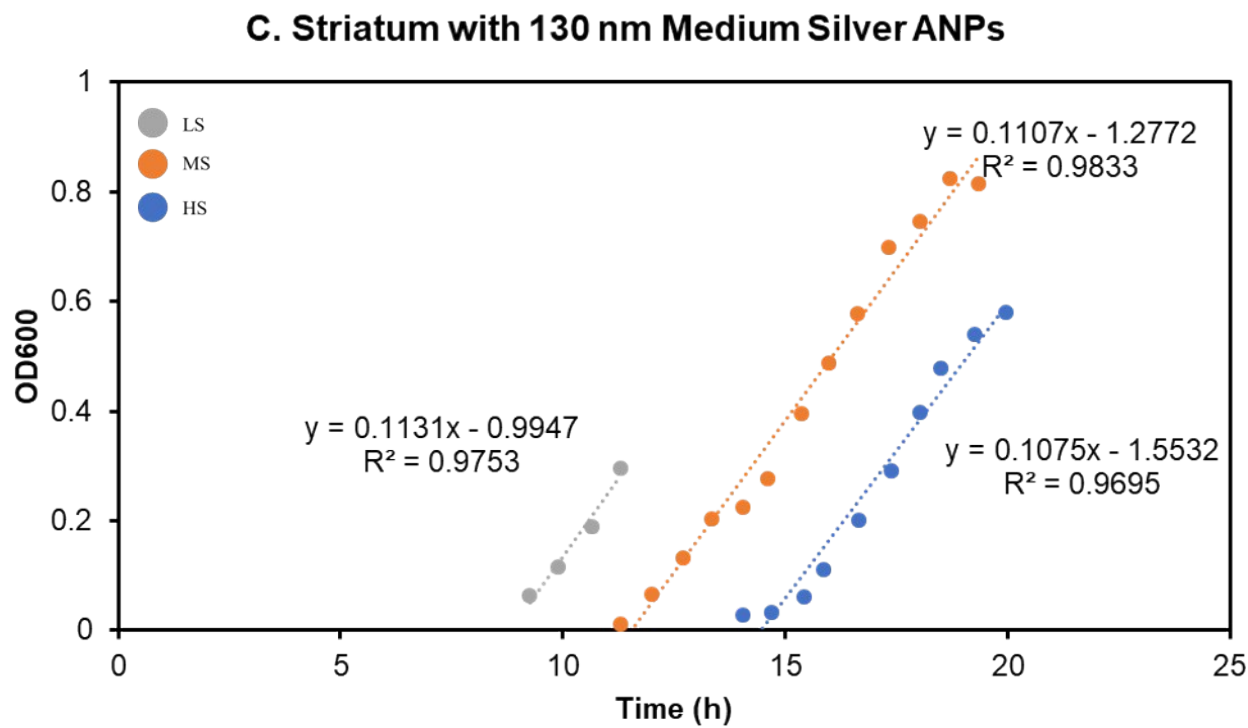

Supplement: c9na00461k1.pdf [file c9na00461k1.pdf]
